# Supplementary material
Source: PubMed Central journal article supplement (PMC4174094)
Supplement: nn503887r_si_001.pdf [file nn503887r_si_001.pdf]

## Supporting Information

# Instillation *versus* Inhalation of Multiwalled Carbon Nanotubes: Exposure-Related Health Effects, Clearance, and the Role of Particle Characteristics

*Rona M. Silva*<sup>\*</sup>, *Kyle Doudrick*<sup>†</sup>, *Lisa M. Franzi*<sup>‡</sup>, *Christel TeeSy*<sup>\*</sup>, *Donald S. Anderson*<sup>\*</sup>,  
*Zheqiong Wu*<sup>§</sup>, *Somenath Mitra*<sup>§</sup>, *Vincent Vu*<sup>¶</sup>, *Gavin Dutrow*<sup>¶</sup>, *James E. Evans*<sup>¶</sup>, *Paul  
Westerhoff*<sup>†</sup>, *Laura S. Van Winkle*<sup>\*</sup>, *Otto G. Raabe*<sup>\*¶</sup>, and *Kent E. Pinkerton*<sup>¶</sup>

<sup>\*</sup>Center for Health and the Environment, University of California, Davis, CA 95616. Email:  
lusilva@ucdavis.edu, cteesy@gmail.com, dsanderson@ucdavis.edu, lsvanwinkle@ucdavis.edu

<sup>†</sup>School of Sustainable Engineering and The Built Environment, Arizona State University,  
Tempe, AZ 85287-5306. Email: kdoudric@asu.edu, P.WESTERHOFF@asu.edu

<sup>‡</sup>Department of Pulmonary Medicine, School of Medicine, University of California, Davis, CA  
95616. Email: lisa.franzi@ucdmc.ucdavis.edu

<sup>§</sup>Department of Chemistry and Environmental Science, New Jersey Institute of Technology,  
Newark, NJ 07102. Email: Somenath.Mitra@njit.edu

<sup>¶</sup>Department of Molecular and Cellular Biology, University of California, Davis, CA 95616.

Email: [Vdvu@ucdavis.edu](mailto:Vdvu@ucdavis.edu), [ghdutrow@ucdavis.edu](mailto:ghdutrow@ucdavis.edu)

<sup>‡</sup>Environmental Molecular Sciences Laboratory, Pacific Northwest National Laboratory,

Richland, WA 99354. Email: [James.Evans@pnnl.gov](mailto:James.Evans@pnnl.gov)

<sup>✦</sup>Department of Molecular Biosciences, School of Veterinary Medicine, University of California,

Davis, CA 95616. Email: [ograabe@ucdavis.edu](mailto:ograabe@ucdavis.edu)

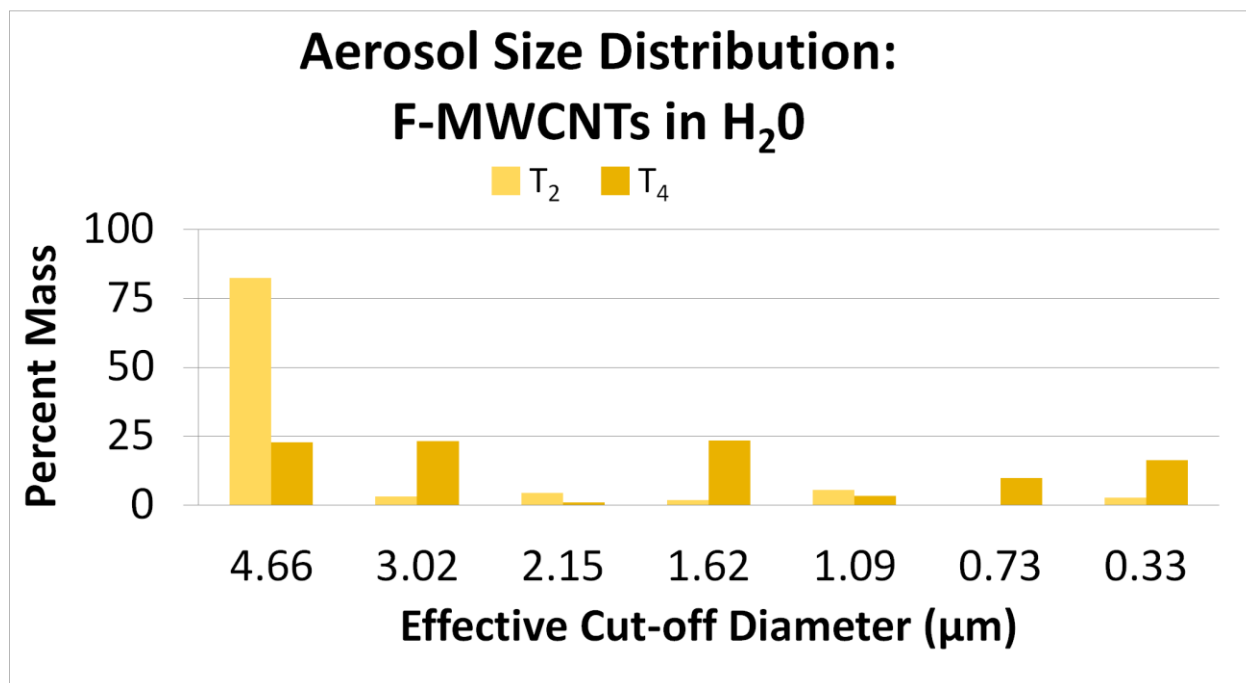

**Figure S1. Aerosolized F-MWCNTs in water exhibited a range of droplet sizes.** Panels show results from cascade impactor sampling during a six-hour inhalation exposure to F-MWCNTs in water. The cascade impactor had 7 stages with effective cut-off diameters ranging from 4.66 µm on stage 1, to 0.33 µm on stage 7. Samples were taken at multiple time-points corresponding to two (T<sub>2</sub>) and four hours (T<sub>4</sub>) into the exposure.

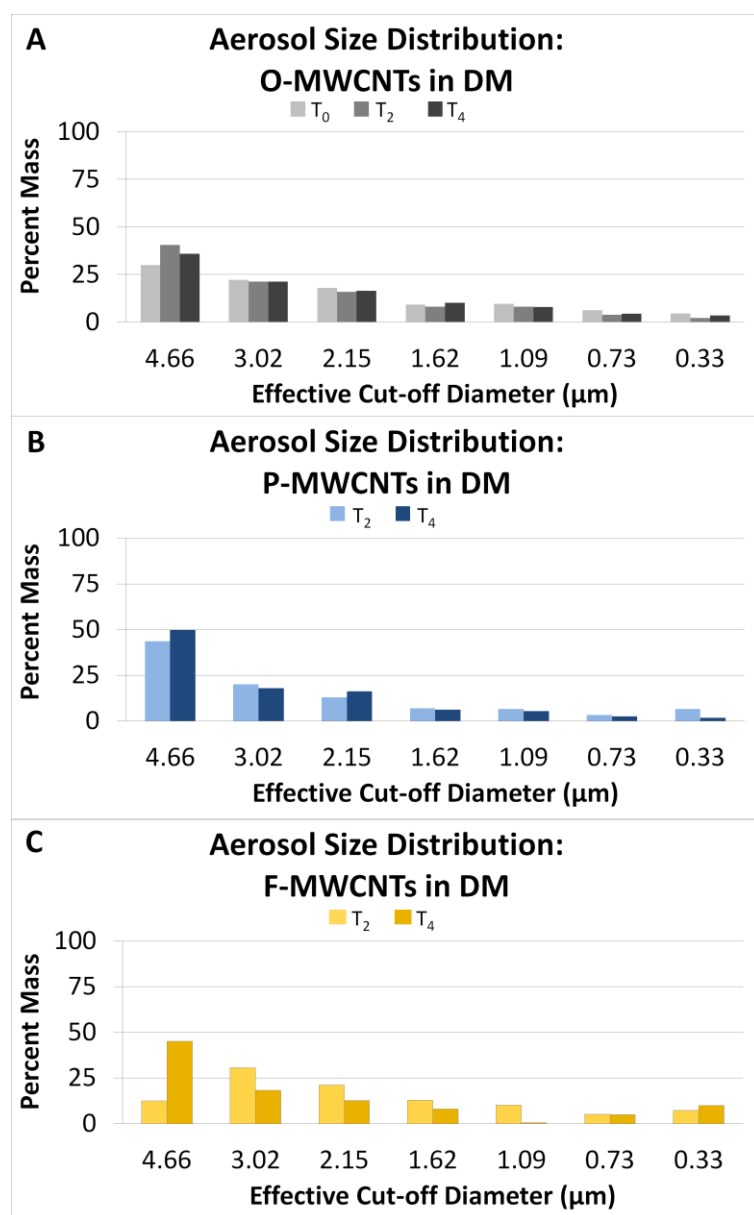

**Figure S2. Aerosolized MWCNTs in dispersion media (DM) produced normally-distributed droplet sizes.** Panels show results from cascade impactor sampling during six-hour inhalation exposures to either O-, P-, or F-MWCNTs (panels A-C, respectively) suspended in DM. The cascade impactor had 7 stages with effective cut-off diameters ranging from 4.66  $\mu\text{m}$  on stage 1, to 0.33  $\mu\text{m}$  on stage 7. Samples were taken at multiple time-points corresponding to zero (T<sub>0</sub>), two (T<sub>2</sub>) or four hours (T<sub>4</sub>) into the exposure for panels A -C.

MWCNT formulation and time post exposure were significant factors post IT/inhalation of MWCNTs suspended in DM. Total cell numbers ( $10^4$ ) were significantly higher at post instillation Day 1 ( $M = 209.20$ ) than Day 21 ( $M = 182.64$ ) (Table S1), and upon O- ( $M = 211.59$ ) *versus* P-MWCNT ( $M = 180.34$ ) instillation. Instilled F-MWCNTs produced an intermediate response that was not significantly different from O- or P-MWCNTs. For inhaled MWCNTs in DM, total cell numbers ( $10^4$ ) were higher at Day 21 ( $M = 129.08$ ) *versus* Day 1 ( $M = 107.60$ ), and upon inhalation of O-MWCNTs ( $M = 132.65$ ) *versus* P-MWCNTs ( $M = 105.08$ ) (Table S1). Inhalation of F-MWCNTs in DM produced intermediate numbers of cells ( $M = 117.30$ ), which were not significantly different from those post O- or P-MWCNT inhalation.

**Table S1. Significant Post Hoc Comparisons of Main Effects: BALF Total Cells ( $10^4$ ) post Instillation or Inhalation of MWCNTs in Dispersion Media**

| Compared Factor(s)    | Group I (A) | Group II (B) | Mean Difference (A-B) | Standard Error Difference (A-B) | <i>p</i> - value | <i>df</i> | LCL  | UCL   |
|-----------------------|-------------|--------------|-----------------------|---------------------------------|------------------|-----------|------|-------|
| Time post IT          | Day 1       | Day 21       | 28.23                 | 10.15                           | 0.01             | 1         | 8.10 | 48.35 |
| Instilled Formulation | O-          | P-           | 31.24                 | 12.38                           | 0.05             | 2         | 1.84 | 60.65 |
| Time post Inhalation  | Day 1       | Day 21       | 21.47                 | 7.90                            | 0.01             | 1         | 5.66 | 37.28 |
| Inhaled Formulation   | O- in DM    | P- in DM     | 27.57                 | 9.60                            | 0.05             | 2         | 4.49 | 50.65 |

*df* = degrees of freedom. LCL and UCL = lower confidence limit, and upper confidence limit, respectively. O-, P- = original, and purified multi-walled carbon nanotubes, respectively. IT = intratracheal instillation, and DM = dispersion media.

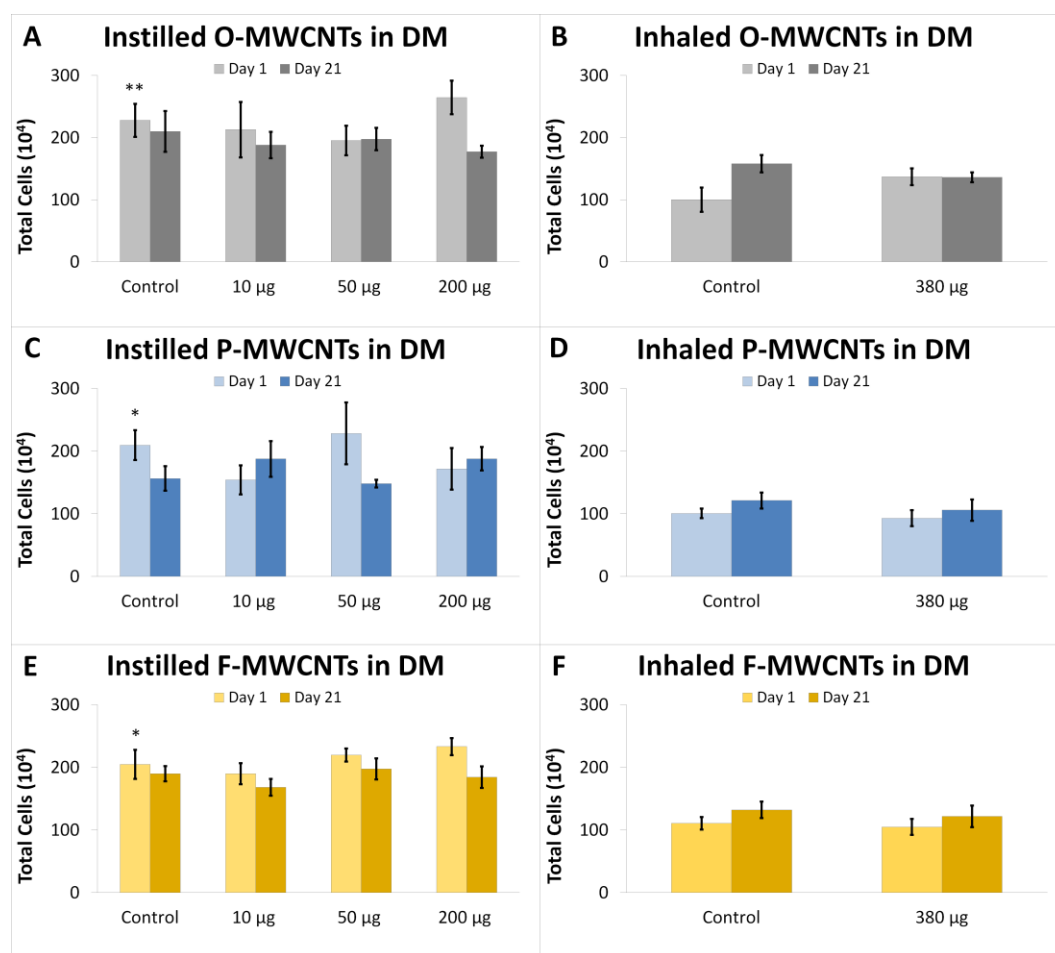

**Figure S3. Instillation produces more BALF cells than inhalation.** Total cells in BALF at Day 1 (left panels) and Day 21 (right panels) post intratracheal instillation (IT) or inhalation. “Control” animals were instilled with 250 µL of DM for IT studies, or maintained in a filtered air environment for inhalation studies. “Exposed” animals got O-MWCNTs (A & B), P-MWCNTs (C & D), or F-MWCNTs (E & F) suspended in dispersion media (DM) *via* IT or inhalation, or F-MWCNTs suspended in water (H<sub>2</sub>O) *via* inhalation. Results are from ANOVA considering dose (control *versus* exposed), time (Day 1 *versus* Day 21), and particle formulation/administration method. Asterisks (\*) indicate significant differences (\* $p \leq 0.05$ , \*\* $p \leq 0.01$ ) between groups sacrificed on the same day, but exposed *via* different administration methods (Instillation *versus* Inhalation with DM).

Overall, the total number of neutrophils in BALF was higher at post IT Day 1 ( $M = 461.20$ ) than Day 21 ( $M = 69.82$ ) (Table S2), and control animals ( $M = 102.53$ ) exhibited significantly less inflammation than those instilled with MWCNTs (Table S2).

**Table S2. Significant Post Hoc Comparisons of Main Effects: Square root-transformed Number of Neutrophils post IT**

| Compared Factor | Group I (A) | Group II (B) | Mean Difference (A-B) | Standard Error Difference (A-B) | p-value | df | LCL    | UCL    |
|-----------------|-------------|--------------|-----------------------|---------------------------------|---------|----|--------|--------|
| Time            | Day 1       | Day 21       | 391.37                | 27.21                           | CON     | 1  | 337.46 | 445.29 |
| Dose            | 200 $\mu$ g | Control      | 380.98                | 39.49                           | CON     | 3  | 277.96 | 484.00 |
| Dose            | 200 $\mu$ g | 10 $\mu$ g   | 265.75                | 39.49                           | CON     | 3  | 162.74 | 368.77 |
| Dose            | 200 $\mu$ g | 50 $\mu$ g   | 225.25                | 39.49                           | CON     | 3  | 122.23 | 328.27 |
| Dose            | 50 $\mu$ g  | Control      | 155.73                | 37.43                           | 0.001   | 3  | 58.08  | 253.39 |
| Dose            | 10 $\mu$ g  | Control      | 115.23                | 37.43                           | 0.05    | 3  | 17.57  | 212.88 |

CON represents “convincing” findings at  $p < 0.0001$ .  $df$  = degrees of freedom. LCL and UCL = lower confidence limit, and upper confidence limit, respectively.

When the interaction of time and dose was analyzed, total polymorphonuclear cells (PMNs: neutrophils) in BALF was significantly higher for animals instilled with 200  $\mu\text{g}$  MWCNTs ( $M = 860.38$ ) in contrast to other doses (Table S3), at Day 1 specifically; and by Day 21, all MWCNT-instilled animals had significantly less neutrophils than at Day 1 (Table S3).

**Table S3. Significant Post Hoc Comparisons of Interactions: Square root-Transformed Number of Neutrophils post IT**

| Compared Factors | Group I (A)              | Group II (B)              | Mean Difference (A-B) | Standard Error Difference (A-B) | p-value | df | LCL    | UCL    |
|------------------|--------------------------|---------------------------|-----------------------|---------------------------------|---------|----|--------|--------|
| Time & Dose      | Day 1, 200 $\mu\text{g}$ | Day 1, Control            | 702.02                | 56.65                           | CON     | 3  | 526.96 | 877.08 |
| Time & Dose      | Day 1, 200 $\mu\text{g}$ | Day 1, 10 $\mu\text{g}$   | 479.56                | 56.65                           | CON     | 3  | 304.50 | 654.62 |
| Time & Dose      | Day 1, 200 $\mu\text{g}$ | Day 1, 50 $\mu\text{g}$   | 415.16                | 56.65                           | CON     | 3  | 240.11 | 590.22 |
| Time & Dose      | Day 1, 50 $\mu\text{g}$  | Day 1, Control            | 286.86                | 53.79                           | CON     | 3  | 120.65 | 453.06 |
| Time & Dose      | Day 1, 10 $\mu\text{g}$  | Day 1, Control            | 222.45                | 53.79                           | 0.01    | 3  | 56.25  | 388.66 |
| Time & Dose      | Day 1, 200 $\mu\text{g}$ | Day 21, 200 $\mu\text{g}$ | 753.75                | 58.61                           | CON     | 3  | 572.63 | 934.87 |
| Time & Dose      | Day 1, 50 $\mu\text{g}$  | Day 21, 50 $\mu\text{g}$  | 373.93                | 52.94                           | CON     | 3  | 210.34 | 537.51 |
| Time & Dose      | Day 1, 10 $\mu\text{g}$  | Day 21, 10 $\mu\text{g}$  | 326.14                | 52.94                           | CON     | 3  | 162.55 | 489.72 |

CON represents “convincing” findings at  $p < 0.0001$ .  $df$  = degrees of freedom. LCL and UCL = lower confidence limit, and upper confidence limit, respectively.



Overall, neutrophilia was higher at Day 1 ( $M = 42.22$ ) than Day 21 ( $M = 16.14$ ) (Table S4), and filtered-air control animals ( $M = 12.24$ ) exhibited significantly less inflammation than those exposed to aerosolized MWCNTs in DM ( $M = 46.12$ ) (Table S4). Inhalation of MWCNTs in DM ( $M = 68.21$ ) *versus* filtered air ( $M = 16.22$ ) produced significant increases in neutrophils recovered from BALF at Day 1 (Table S4); however, this inflammation resolved by Day 21 (Table S4). Inhalation of F-MWCNTs in water did not affect neutrophils in BALF in comparison to the filtered air control (data not shown).

**Table S4. Significant Post Hoc Comparisons: Square root-Transformed Number of Neutrophils post Inhalation**

| Compared Factor(s)  | Group I (A)        | Group II (B)        | Mean Difference (A-B) | Standard Error Difference (A-B) | p-value | df | LCL   | UCL   |
|---------------------|--------------------|---------------------|-----------------------|---------------------------------|---------|----|-------|-------|
| <b>Main Effects</b> |                    |                     |                       |                                 |         |    |       |       |
| Time                | Day 1              | Day 21              | 26.08                 | 7.35                            | 0.001   | 1  | 11.36 | 40.79 |
| Dose                | Control            | Exposed             | 33.88                 | 7.35                            | CON     | 1  | 19.16 | 48.59 |
| <b>Interactions</b> |                    |                     |                       |                                 |         |    |       |       |
| Time & Dose         | Day 1, 380 $\mu$ g | Day 1, Control      | 51.99                 | 10.48                           | CON     | 1  | 24.28 | 79.71 |
| Time & Dose         | Day 1, 380 $\mu$ g | Day 21, 380 $\mu$ g | 59.95                 | 10.48                           | CON     | 1  | 32.24 | 87.67 |

CON represents “convincing” findings at  $p < 0.0001$ .  $df$  = degrees of freedom. LCL and UCL = lower confidence limit, and upper confidence limit, respectively.

**Table S5. Significant Post Hoc Comparisons: Square root-Transformed Number of MWCNT-Positive Macrophages post IT**

| Compared Factor(s)        | Group I (A)       | Group II (B)     | Mean Difference (A-B) | Standard Error Difference (A-B) | <i>p</i> - value | <i>df</i> | LCL   | UCL   |
|---------------------------|-------------------|------------------|-----------------------|---------------------------------|------------------|-----------|-------|-------|
| <b>Main Effects</b>       |                   |                  |                       |                                 |                  |           |       |       |
| Time                      | Day 1             | Day 21           | 300.41                | 39.64                           | CON              | 1         | 221.9 | 378.9 |
| Dose                      | 10 µg             | Control          | 158.03                | 54.54                           | 0.05             | 3         | 15.75 | 300.3 |
| Dose                      | 50 µg             | Control          | 465.05                | 54.54                           | CON              | 3         | 322.8 | 607.3 |
| Dose                      | 200 µg            | Control          | 453.84                | 57.54                           | CON              | 3         | 303.7 | 603.9 |
| Dose                      | 50 µg             | 10 µg            | 307.01                | 54.54                           | CON              | 3         | 164.7 | 449.3 |
| Dose                      | 200 µg            | 10 µg            | 295.8                 | 57.54                           | CON              | 3         | 145.7 | 445.9 |
| <b>Interactions</b>       |                   |                  |                       |                                 |                  |           |       |       |
| Time & Dose               | Day 1, 10 µg      | Day 1, Control   | 272.73                | 78.37                           | 0.05             |           | 30.6  | 514.9 |
| Time & Dose               | Day 1, 200 µg     | Day 1, 10 µg     | 404.43                | 82.54                           | CON              |           | 149.4 | 659.5 |
| Time & Dose               | Day 1, 50 µg      | Day 1, Control   | 636.41                | 78.37                           | CON              |           | 394.3 | 878.6 |
| Time & Dose               | Day 1, 50 µg      | Day 1, 10 µg     | 363.67                | 78.37                           |                  |           | 121.5 | 605.8 |
| Time & Dose               | Day 1, 200 µg     | Day 1, Control   | 677.16                | 82.54                           | CON              |           | 422.1 | 932.2 |
| Time & Dose               | Day 1, 10 µg      | Day 21, 10 µg    | 275.12                | 77.13                           | 0.01             |           | 36.8  | 513.5 |
| Time & Dose               | Day 1, 50 µg      | Day 21, 50 µg    | 388.44                | 77.13                           | CON              |           | 150.1 | 626.8 |
| Time & Dose               | Day 1, 200 µg     | Day 21, 200 µg   | 492.37                | 85.40                           | CON              |           | 228.5 | 756.3 |
| Time, Dose, & Formulation | Day 1, 50 µg, O-  | Day 1, 10 µg, O- | 615.85                | 131.42                          | .01              |           | 125.4 | 1106  |
| Time, Dose, & Formulation | Day 1, 200 µg, O- | Day 1, 10 µg, O- | 851.53                | 137.84                          | CON              |           | 337.2 | 1366  |

CON = “convincing” findings,  $p < 0.0001$ . *df* = degrees of freedom. LCL and UCL = lower confidence limit, and upper confidence limit, respectively. O-, P-, F- = original, purified, and functionalized multi-walled carbon nanotubes, respectively.

**Semi-Quantitative Histopathology Scoring Rubric**

| Type of Pathology                | Score                                                                                            |                                                                                                                                     |                                                                                                                                                                                                            |                                                                                                                                                                                |
|----------------------------------|--------------------------------------------------------------------------------------------------|-------------------------------------------------------------------------------------------------------------------------------------|------------------------------------------------------------------------------------------------------------------------------------------------------------------------------------------------------------|--------------------------------------------------------------------------------------------------------------------------------------------------------------------------------|
|                                  | 0                                                                                                | 1                                                                                                                                   | 2                                                                                                                                                                                                          | 3                                                                                                                                                                              |
| <b>Alveolitis</b>                | Normal. Thin alveolar walls, with very few free macrophages in the lumen. No inflammatory cells. | Similar to 0 score with more free macrophages in the alveolar lumen. No PMNs.                                                       | Atypical cellularity in the walls and/or lumen of the alveoli with the majority of the alveolar spaces still clear of free cells. Over-represented cell types include macrophages, monocytes, and/or PMNs. | Thickened alveolar walls. Marked influx of mixed cells (phagocytes and/or PMNs) into the alveolar lumen forming large cellular agglomerates which occupy much of the airspace. |
| <b>Bronchiolitis</b>             | Normal respiratory epithelium, 1 cell-layer thick. Normal smooth muscle and submucosal layers.   | Mild influx of macrophages and/or monocytes to the airway submucosa, but no PMNs.                                                   | Slightly thickened airway due to moderate influx of PMNs and/or phagocytes into the submucosa. PMNs encompass <15% of influxing cells.                                                                     | Marked influx of inflammatory cells into the submucosal layer causing pronounced thickening of the airway. A high percentage of PMNs may be present, but is not necessary.     |
| <b>Perivascular Inflammation</b> | Normal vascular endothelium.                                                                     | Mild influx of a few macrophages and/or monocytes to the region, but no PMNs. Nearly all of the connective tissue is still visible. | Moderate PMN and/or phagocyte infiltrates with much of the connective tissue still visible.                                                                                                                | Marked mixed cellular infiltrates such that much of the connective tissue is obscured by influxing cells. A high percentage of PMNs may be present.                            |
| <b>Particle Agglomerates</b>     | No particle agglomerates.                                                                        | Obvious particle agglomerate with little/no increase in vicinal cellularity.                                                        | Obvious particle agglomerate with moderate increase in vicinal cellularity. Phagocyte and/or PMN influx. Small cellular aggregates possible.                                                               | Obvious particle agglomerate surrounded by large, focal cellular infiltrates.                                                                                                  |
| <b>Pleural Inflammation</b>      | Little/no cells at the pleura.                                                                   | Slightly increased cellularity at the pleura. No PMNs.                                                                              | Moderately increased cellularity with PMNs and/or phagocytes.                                                                                                                                              | Severe influx of cells to the pleura. A high percentage of PMNs may be present along with foamy macrophages.                                                                   |

**Figure S4. Semi-Quantitative Histopathology Scoring Rubric**

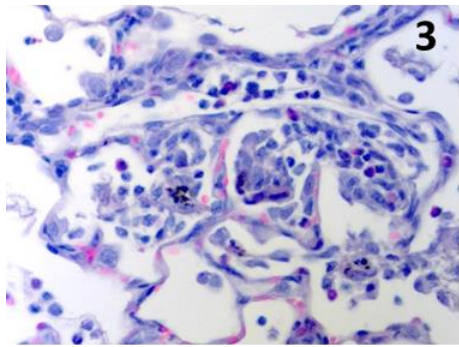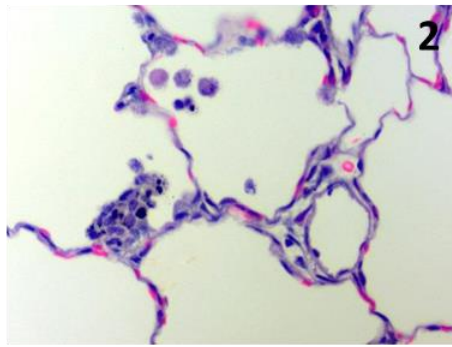

Alveolitis

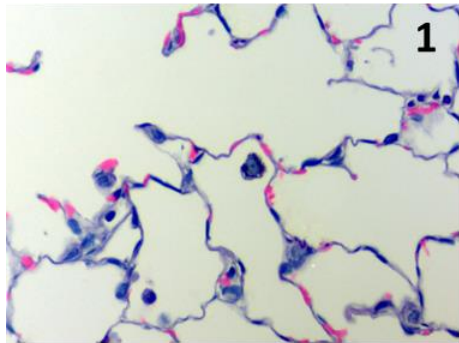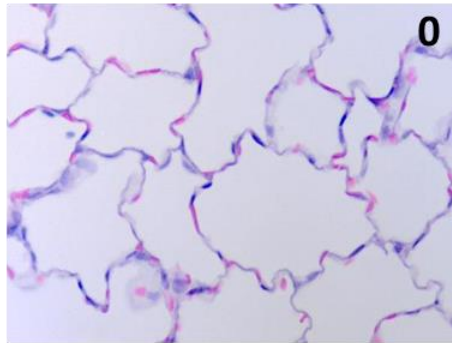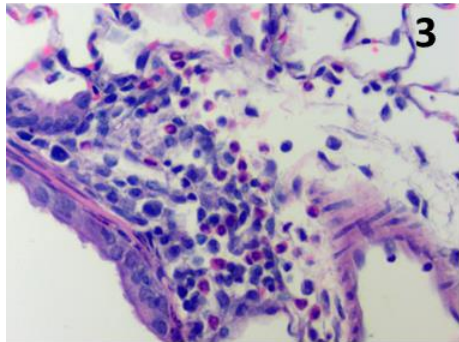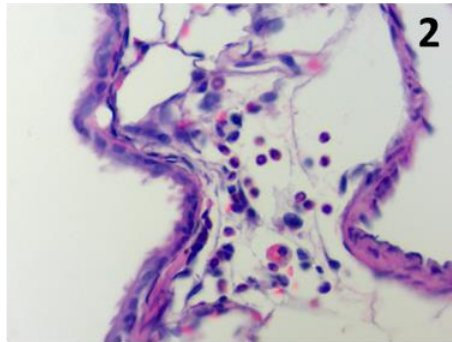

Bronchiolitis

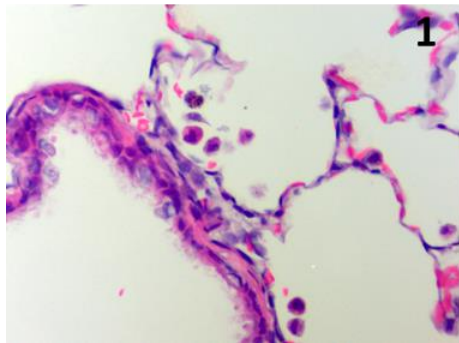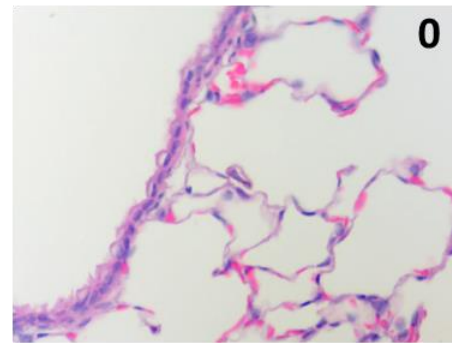

Figure S5. Illustrated Histopathology Scoring Reference: Part I

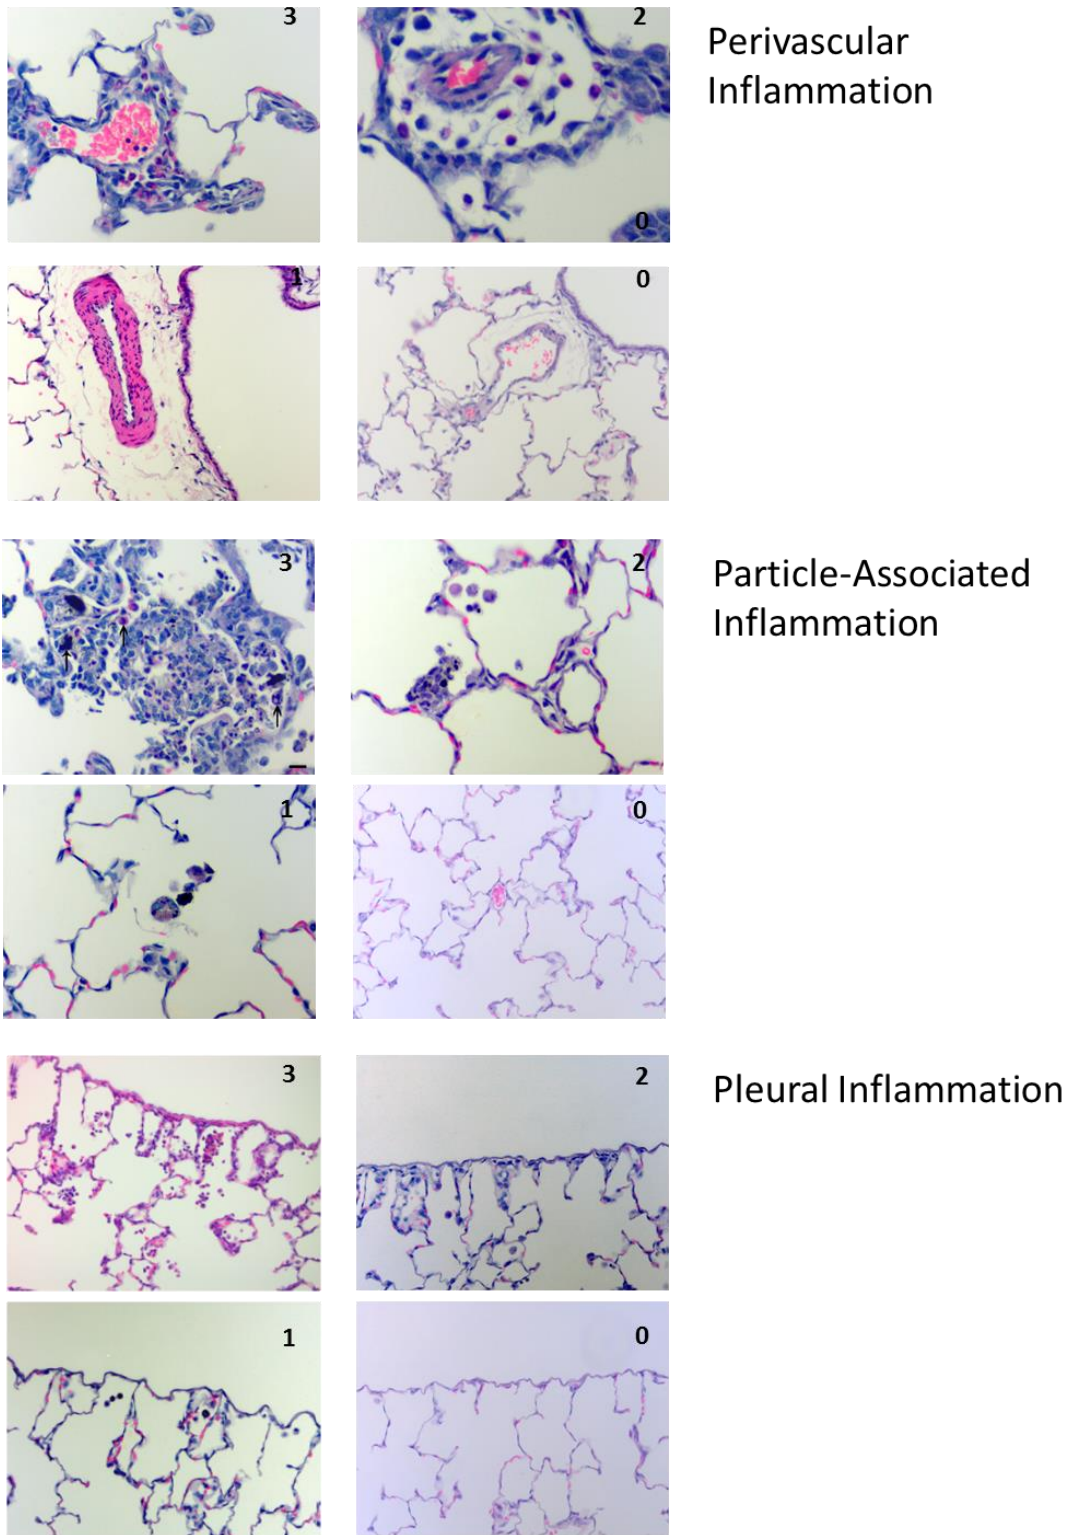

**Figure S6. Illustrated Histopathology Scoring Reference: Part II**

**Table S6. Significant Post Hoc Comparisons of Main Effects: Day 21 Histopathology post IT**

| Pathology Compared               | Group I Mean (A) | Group II Mean (B) | Mean Difference (A-B) | Standard Error Difference (A-B) | <i>p</i> - value | <i>df</i> | LCL  | UCL  |
|----------------------------------|------------------|-------------------|-----------------------|---------------------------------|------------------|-----------|------|------|
| <b>Main Effect = Formulation</b> |                  |                   |                       |                                 |                  |           |      |      |
| Bronchiolitis                    | O-               | F-                | 0.92                  | 0                               | CON              | 2         | 0.52 | 1.31 |
| Bronchiolitis                    | P-               | F-                | 1.04                  | 0                               | CON              | 2         | 0.62 | 1.46 |
| Perivascular Inflammation        | O-               | F-                | 0.50                  | 0.19                            | 0.05             | 2         | 0.03 | 0.97 |
| Pleural Inflammation             | O-               | F-                | 1.00                  | 0.18                            | CON              | 2         | 0.56 | 1.44 |
| Pleural Inflammation             | P-               | F-                | 1.04                  | 0.19                            | CON              | 2         | 0.57 | 1.51 |
| <b>Main Effect = Dose</b>        |                  |                   |                       |                                 |                  |           |      |      |
| Particle-Associated Inflammation | 200 µg, M = 0.83 | Control, M =0.28  | 0.56                  | 0.25                            | 0.05             | 1         | .    | .    |

CON = “convincing” findings,  $p < 0.0001$ . *df* = degrees of freedom. LCL and UCL = lower confidence limit, and upper confidence limit, respectively. O-, P-, F- = original, purified, and functionalized multi-walled carbon nanotubes, respectively.

**Table S7. Significant Post Hoc Comparisons of Main Effects: Day 21 Histopathology post Exposure (Instillation *versus* Inhalation)**

| Pathology Compared                   | Group I (A)  | Group II (B)     | Mean Difference (A-B) | Standard Error Difference (A-B) | p-value | df | LCL  | UCL  |
|--------------------------------------|--------------|------------------|-----------------------|---------------------------------|---------|----|------|------|
| <b>Main Effect = Exposure Method</b> |              |                  |                       |                                 |         |    |      |      |
| Alveolitis                           | Instilled O- | Inhaled O- in DM | 1.39                  | 0.23                            | CON     | 6  | 0.71 | 2.07 |
| Alveolitis                           | Instilled P- | Inhaled P- in DM | 1.18                  | 0.25                            | CON     | 6  | 0.45 | 1.91 |
| Alveolitis                           | Instilled F- | Inhaled F- in DM | 2.14                  | 0.23                            | CON     | 6  | 1.46 | 2.82 |
| Bronchiolitis                        | Instilled O- | Inhaled O- in DM | 1.39                  | 0.20                            | CON     | 6  | 0.81 | 1.97 |
| Bronchiolitis                        | Instilled P- | Inhaled P- in DM | 1.51                  | 0.22                            | CON     | 6  | 0.89 | 2.14 |
| Pleural Inflammation                 | Instilled O- | Inhaled O- in DM | 1.83                  | 0.08                            | CON     | 6  | 1.60 | 2.07 |
| Pleural Inflammation                 | Instilled P- | Inhaled P- in DM | 1.88                  | 0.09                            | CON     | 6  | 1.62 | 2.13 |
| Pleural Inflammation                 | Instilled F- | Inhaled F- in DM | 0.83                  | 0.08                            | CON     | 6  | 0.60 | 1.07 |
| Perivascular Inflammation            | Instilled O- | Inhaled O- in DM | 0.86                  | 0.13                            | CON     | 6  | 0.50 | 1.23 |
| Perivascular Inflammation            | Instilled P- | Inhaled P- in DM | 0.53                  | 0.14                            | CON     | 6  | 0.13 | 0.92 |

*df* = degrees of freedom. LCL and UCL = lower confidence limit, and upper confidence limit, respectively. O-, P-, F- = original, purified, and functionalized multi-walled carbon nanotubes, respectively. DM = dispersion media. CON = “convincing” findings,  $p \leq 0.0001$ .

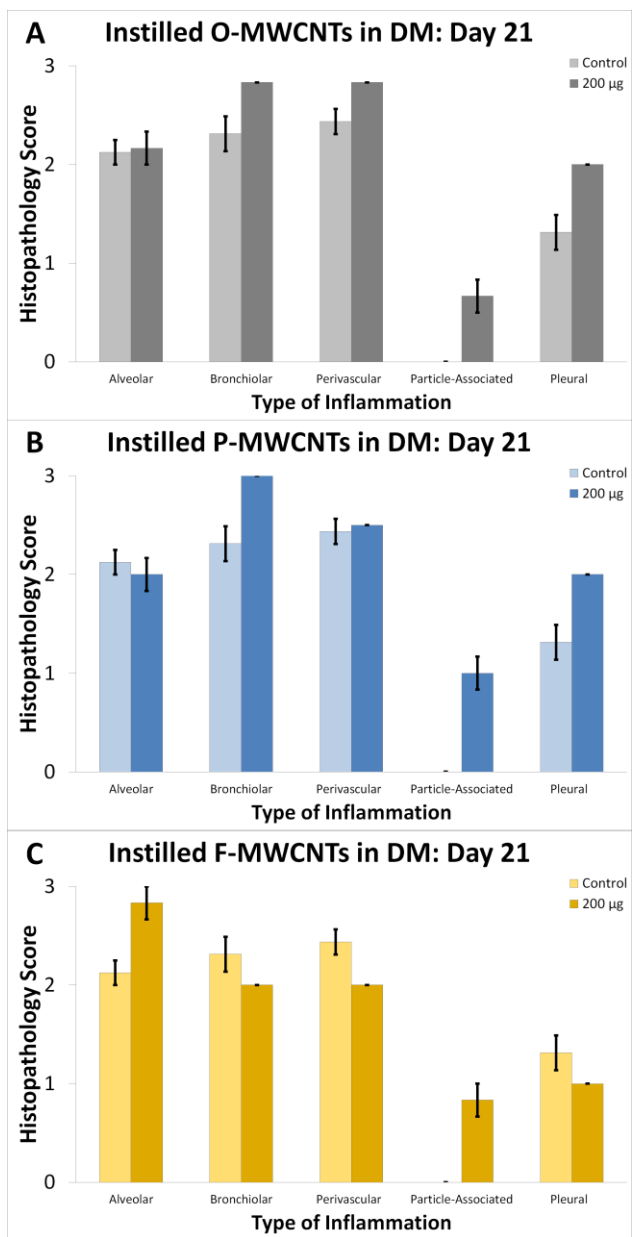

**Figure S7. Histopathology Resulting from MWCNT Instillation of Resolved by Day 21.**

Results from semi-quantitative scoring are shown for O-MWCNTs (A), P-MWCNTs (B), and F-MWCNTs (C) for Day 21. Results are from an ANOVA model considering dose and particle formulation.
